# Supplementary material for: Sea urchin-like Ag–α-Fe2O3 nanocomposite microspheres: synthesis and gas sensing applications
Source: Royal Society of Chemistry journal article supplement (doi:10.1039/c2jm15742j), 2012-01-01
Supplement: c2jm15742j.pdf [file c2jm15742j.pdf]

## Electronic Supplementary Information for

### **Sea urchin-like Ag/ $\alpha$ -Fe<sub>2</sub>O<sub>3</sub> Nanocomposite Microspheres: Synthesis and Gas Sensing Application**

Xijun Liu, Zheng Chang, Liang Luo, Xiaodong Lei, Junfeng Liu\* and Xiaoming Sun

State Key Laboratory of Chemical Resource Engineering, Beijing University of Chemical

Technology, Beijing, 100029, P. R. China

\* Corresponding author. *E-mail*: ljf@mail.buct.edu.cn.

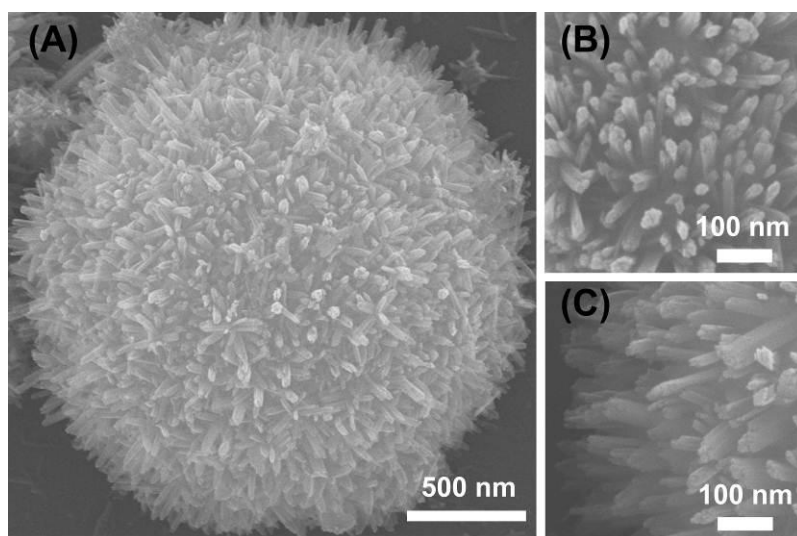

**Fig. S1** SEM images of (A) a single  $\alpha$ -FeOOH microsphere and (B), (C) magnified view of parts of the microsphere from the different visual direction.

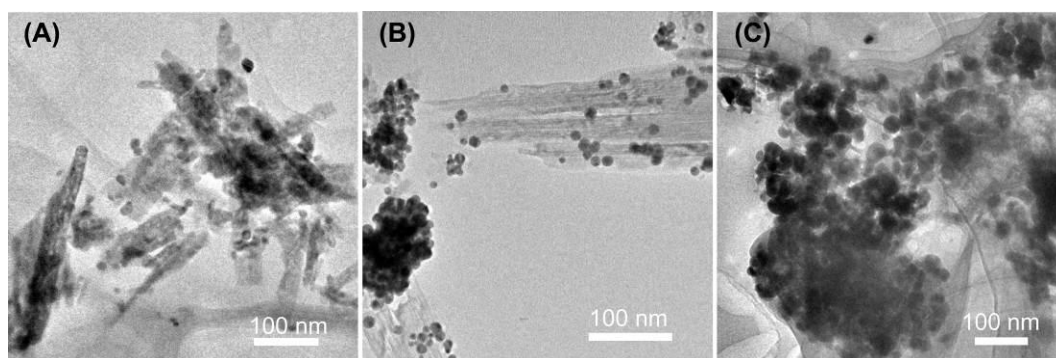

**Fig. S2** TEM images of Ag-loaded  $\alpha$ -Fe<sub>2</sub>O<sub>3</sub> architectures, corresponding to the 5.0 wt% (A), 10.0 wt% (B), and 15.0 wt% (C) Ag/ $\alpha$ -Fe<sub>2</sub>O<sub>3</sub>.

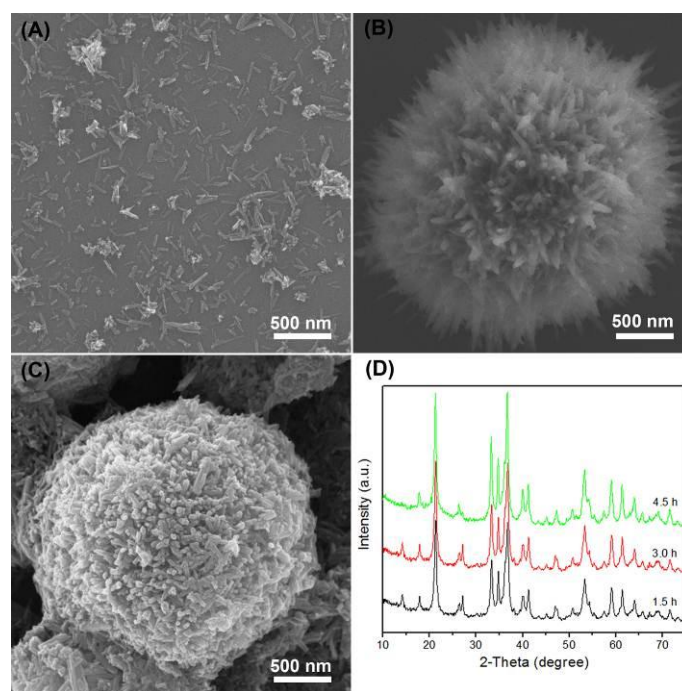

**Fig. S3** Typical SEM images of the as-prepared samples at 120 °C for different reaction times: (A) 1.5 h, (B) 3 h, (C) 4.5 h, and corresponding XRD patterns (D).

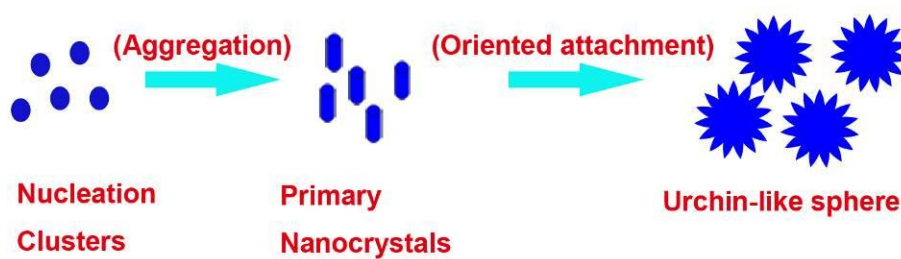

**Fig. S4** Schematic illustration for the formation process of the sea urchin-like  $\alpha$ -FeOOH microspheres.

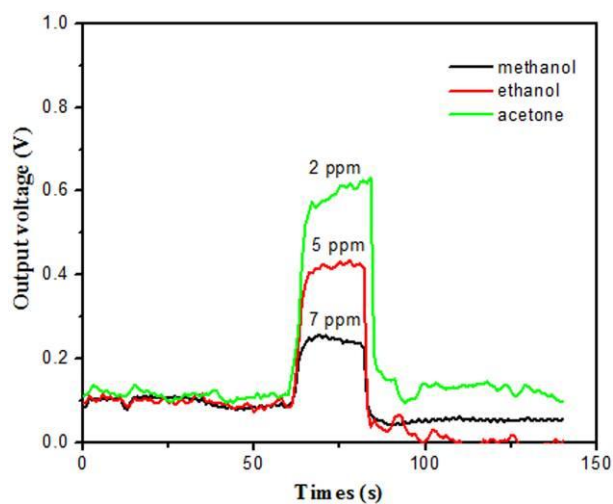

**Fig. S5** Typical response curve and variations of the sensitivity of 3D sea urchin-like 4.0 wt% Ag/ $\alpha$ -Fe<sub>2</sub>O<sub>3</sub> sensors exposed to methanol, ethanol, and acetone.

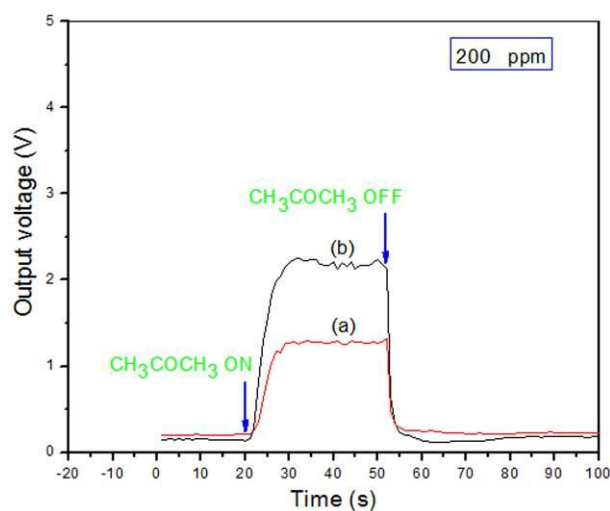

**Fig. S6** Typical response curve and variations of the sensitivity of nanocubes (a) and 3D sea urchin-like  $\alpha$ -Fe<sub>2</sub>O<sub>3</sub> (b) sensors exposed to acetone at concentration of 200 ppm measured at 350 °C.

Table S1. Brunauer–Emmett–Teller surface area and pore size distribution of

Ag/Fe<sub>2</sub>O<sub>3</sub> samples.

| Ag/Fe <sub>2</sub> O <sub>3</sub> (wt%)   | 0    | 0.5  | 1.0  | 2.0  | 4.0  | 5.0  | 10.0 | 15.0 |
|-------------------------------------------|------|------|------|------|------|------|------|------|
| Specific surface area (m <sup>2</sup> /g) | 37.6 | 44.7 | 55.1 | 62.3 | 70.5 | 50.8 | 29.9 | 25.9 |
| Pore size (nm)                            | 5.51 | 5.47 | 5.49 | 5.50 | 5.52 | 5.56 | 5.53 | 5.54 |

Table S2. Elemental analysis of Ag/Fe<sub>2</sub>O<sub>3</sub> samples.

| Ag/Fe <sub>2</sub> O <sub>3</sub> loaded with different Ag contents (wt%) | Ultimate analysis (wt%) |       |       |
|---------------------------------------------------------------------------|-------------------------|-------|-------|
|                                                                           | C                       | H     | S     |
| pure                                                                      | 0.008                   | 0.283 | 1.325 |
| 0.5                                                                       | 0.018                   | 0.230 | 1.636 |
| 1.0                                                                       | 0.003                   | 0.207 | 1.636 |
| 2.0                                                                       | 0.016                   | 0.198 | 1.789 |
| 4.0                                                                       | 0.002                   | 0.134 | 1.982 |
| 5.0                                                                       | 0.004                   | 0.151 | 1.891 |
| 10.0                                                                      | 0.008                   | 0.205 | 1.783 |
| 15.0                                                                      | 0.002                   | 0.179 | 1.672 |
